# Supplementary material for: Plant controls on post-fire nitrogen availability in a pine savanna
Source: Copernicus journal article supplement (doi:10.5194/bg-2016-303), 2016-08-12
Supplement: Supplementary file 1 [file bg-2016-303-supplement.pdf]

|                 | Burned Sites |    |      |
|-----------------|--------------|----|------|
|                 | B1           | B2 | B3   |
| Minimum shift   | 8            | 3  | 11   |
| Empirical shift | 316          | 8  | -108 |

**Supplementary Table S1. The mass of N needed to be deposited at each site in order to achieve a shift in soil  $\delta^{15}\text{N}$  of the minimum external precision, and the observed empirical shift in soil  $\delta^{15}\text{N}$ . These values were calculated from mixing models with fresh leaf  $\delta^{15}\text{N}$  as one end member. Across 1,827 samples from 67 plant species, the mean  $\delta^{15}\text{N}$  was -2.9‰ ( $\pm 0.1$ ; J. Wright, unpublished data). Units are in g N m<sup>-2</sup>. Minimum external precision is 0.1‰  $\delta^{15}\text{N}$  at 1 standard deviation.**
